# Supplementary material for: Identification of a flattened Pd–Ce oxide cluster as a highly efficient catalyst for low-temperature CO oxidation
Source: Royal Society of Chemistry journal article supplement (doi:10.1039/c8cy01590b), 2018-01-01
Supplement: c8cy01590b1.pdf [file c8cy01590b1.pdf]

## Electronic Supplementary Information

# Identification of flattened Pd-Ce oxide cluster highly efficient for low temperature CO oxidation

Yang Xia, Jingrui Ye, Dang-guo Cheng,\* Fengqiu Chen and Xiaoli Zhan

Zhejiang Provincial Key Laboratory of Advanced Chemical Engineering Manufacture Technology,

College of Chemical and Biological Engineering, Zhejiang University, 38 Zheda Road, Hangzhou

310027, China

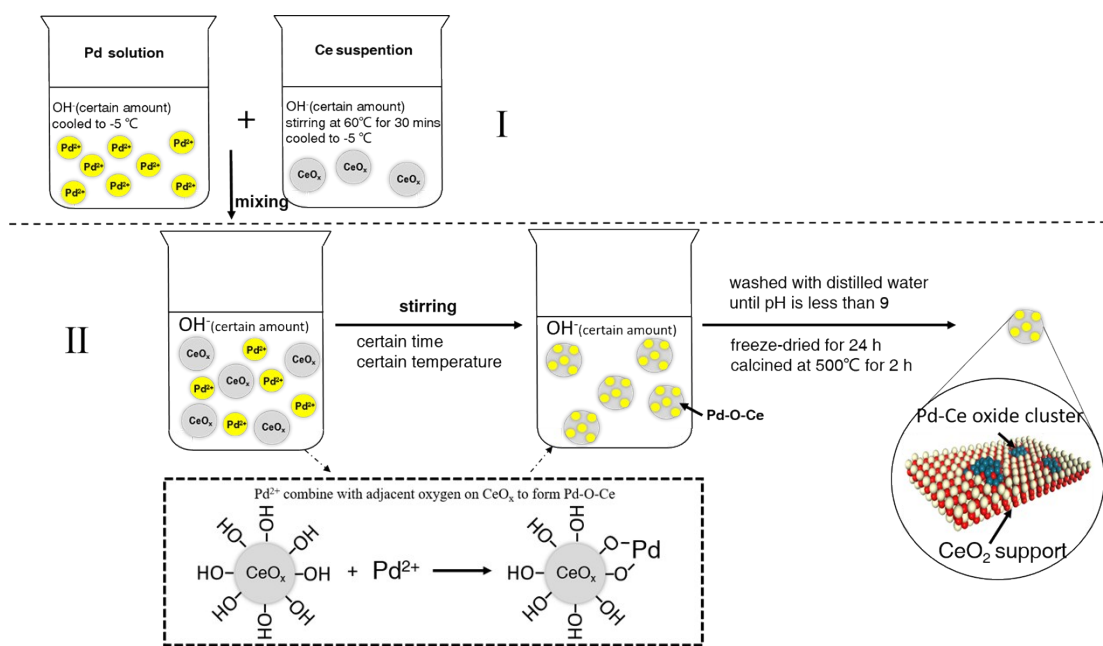

Fig.S1 Preparation process.

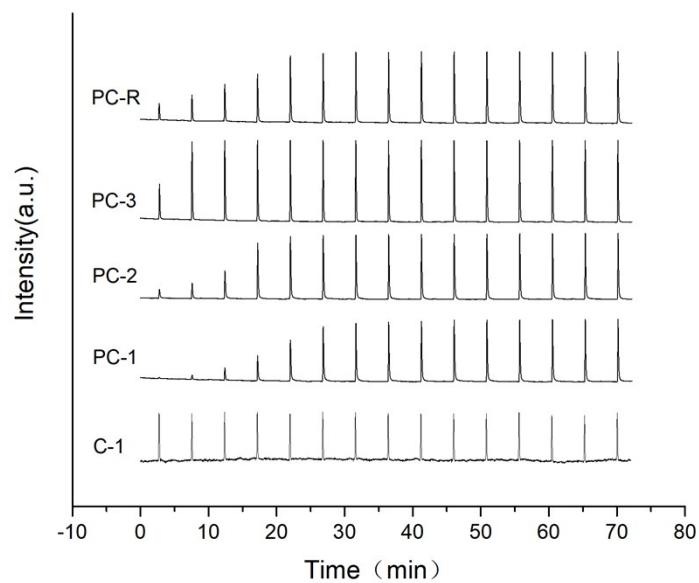

Fig.S2 CO-Pluse injection profile for PC-1, PC-2, PC-3, PC-R and C-1.

**Table S1** Pd concentration, Dispersion, surface area, Pore Volume, and TOFs of Pd/CeO<sub>2</sub>.

| Sample | Concentration wt. % | Dispersion (%) | S <sub>BET</sub> (m <sup>2</sup> • g <sup>-1</sup> ) | Pore Volume (cm <sup>3</sup> • g <sup>-1</sup> ) | TOF (s <sup>-1</sup> , 25°C) | TOF (s <sup>-1</sup> , 50°C) |
|--------|---------------------|----------------|------------------------------------------------------|--------------------------------------------------|------------------------------|------------------------------|
| PC-1   | 0.95%               | 72.0           | 141                                                  | 0.45                                             | 0.59                         | -                            |
| PC-2   | 1.23%               | 35.1           | 112                                                  | 0.33                                             | 0.53                         | -                            |
| PC-3   | 1.10%               | 12.6           | 95                                                   | 0.29                                             | 0.41                         | 1.9                          |
| PC-R   | 1.00%               | 28.9           | 17                                                   | 0.07                                             | -                            | 0.11                         |

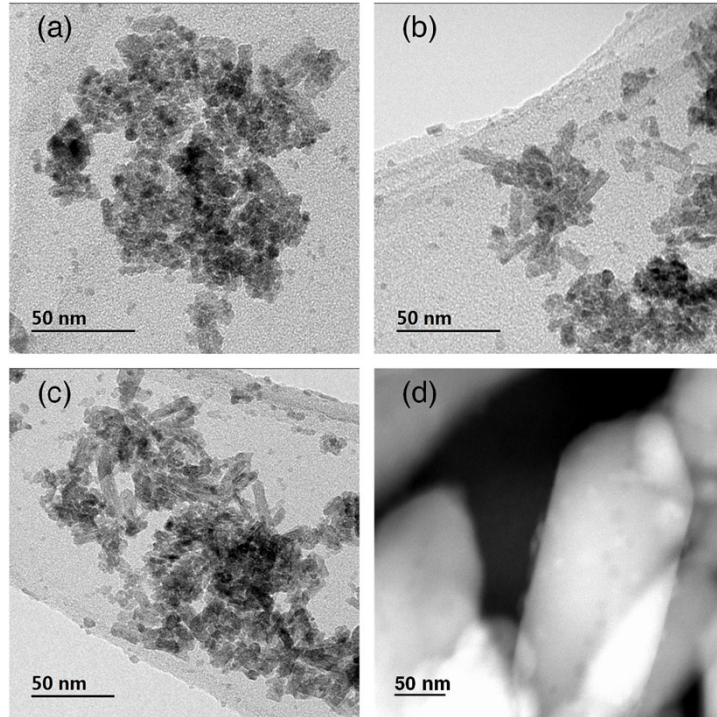

**Fig.S3** TEM images of (a)PC-1, (b)PC-2, (c)PC-3, and STEM images of (d)PC-R.

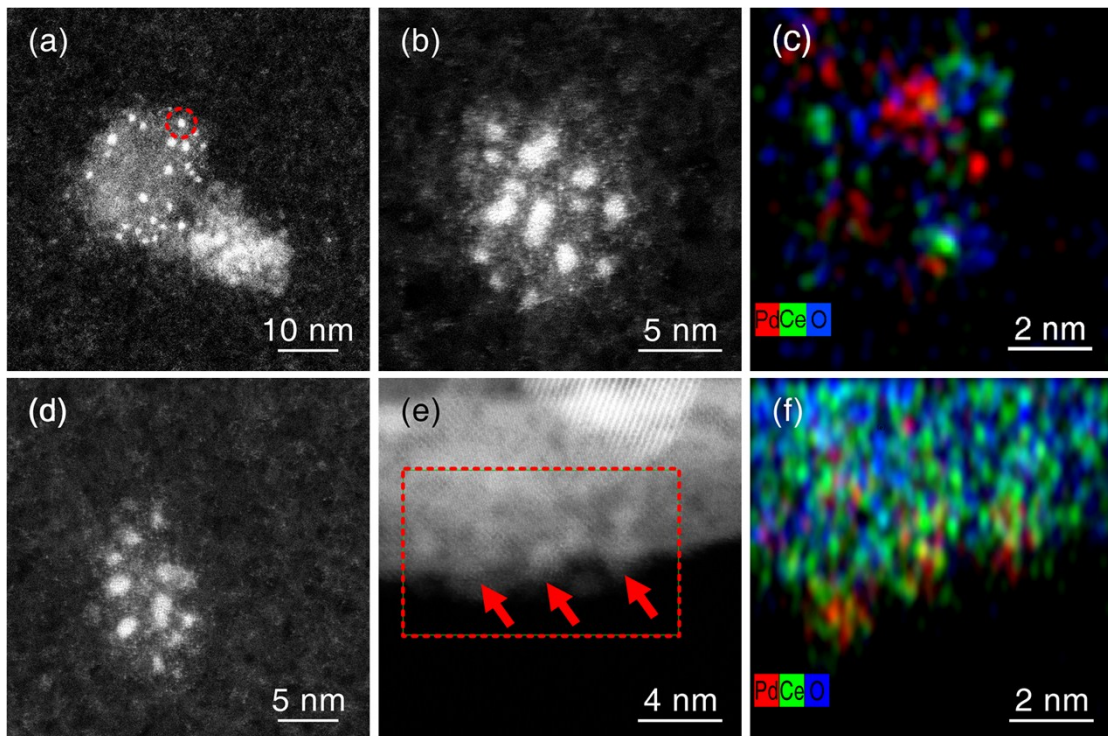

**Fig. S4** Characterization of the PC-2 and PC-3: (a, b) HAADF-STEM of PC-2 under different resolution; (c) EDX mapping pattern of the red frame patch of (a); (d, e) HAADF-STEM of the PC-3 under different resolution(three red arrows point to three spots); (f) EDX mapping pattern of the red frame patch of (e).

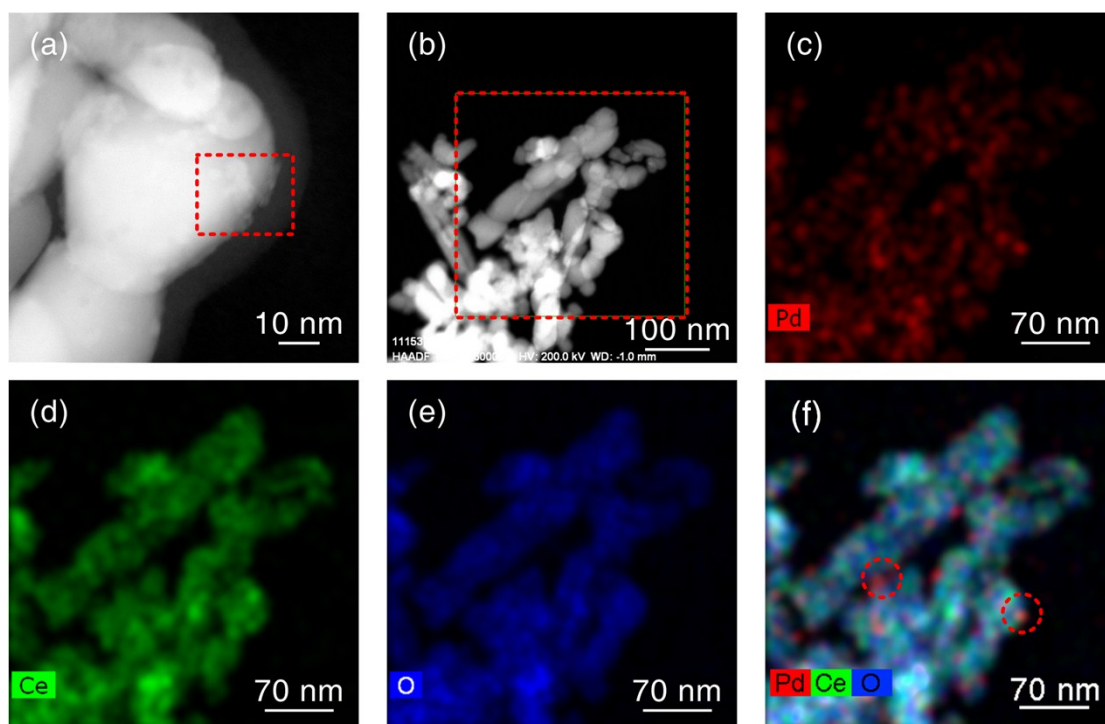

**Fig. S5** Characterization of the PC-R: (a,b) HAADF-STEM of the PC-R under different resolution; EDX mapping pattern of Pd (c), Ce (d), O (e) and all element (f) corresponding to the red frame patch of (b).

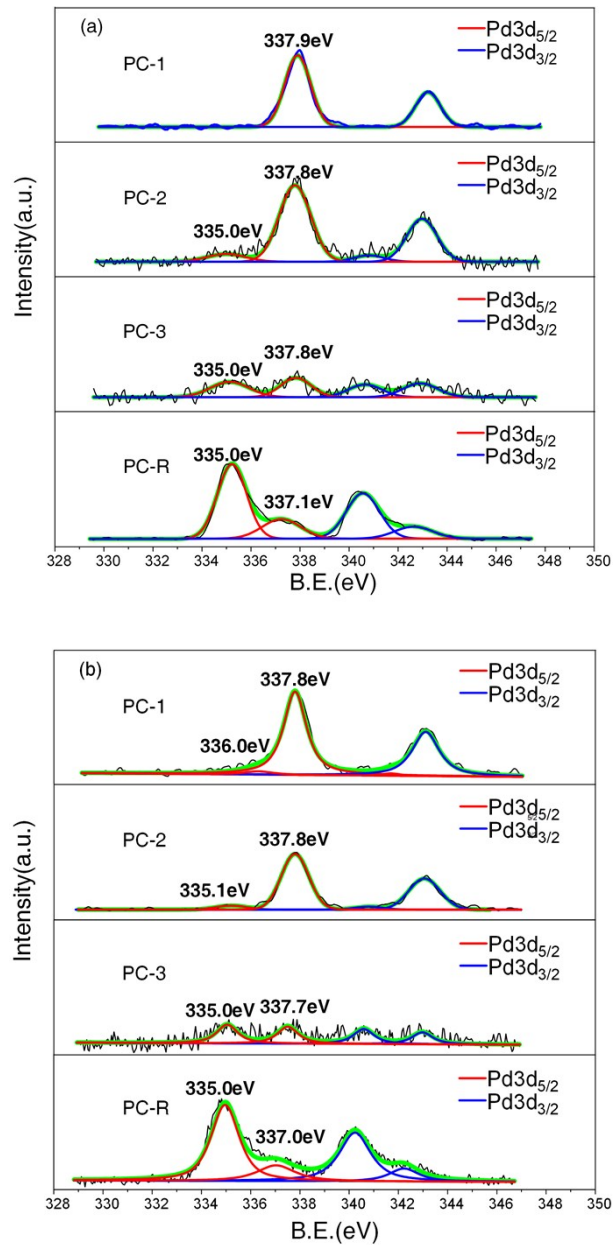

**Fig. S6** XPS Pd3d spectra of (a) catalyst after activation, and (b) catalyst after CO reaction.

**Table S2** H<sub>2</sub>-TPR temperature peaks and the amount of H<sub>2</sub> consumption.

| Sample | Peak Temperature (°C) |           | H <sub>2</sub> consumption(umol/g <sub>catalyst</sub> ) |           | Pd:O (mol:mol) <sup>b</sup> |
|--------|-----------------------|-----------|---------------------------------------------------------|-----------|-----------------------------|
|        | Low peak              | High peak | Low peak <sup>a</sup>                                   | High peak |                             |
| PC-1   | 81                    | 372       | 446                                                     | 105       | 1:4.7                       |
| PC-2   | 48                    | 370       | 303                                                     | 99        | 1:3.2                       |
| PC-3   | 27                    | 380       | 250                                                     | 72        | 1:2.7                       |
| PC-R   | 9                     | 380       | 100                                                     | 47        | 1:1.1                       |
| C-1    | -                     | 420       | -                                                       | 220       | -                           |
| C-2    | -                     | 450       | -                                                       | 196       | -                           |
| C-3    | -                     | 422       | -                                                       | 171       | -                           |
| C-R    | -                     | 400       | -                                                       | 48        | -                           |

<sup>a</sup>Pd loading for four fresh catalyst are all converted to 1wt.%.

<sup>b</sup>H<sub>2</sub> consumption for reduction of typical PdO to Pd is 94 umol/g<sub>catalyst</sub>, H<sub>2</sub> consumption is also converted to mole amount of O consumption, and it is compared with mole amount of Pd.

**Table S3** Calculation of O<sub>2</sub> uptake during activation and sequence O<sub>2</sub>-CO pulse consumption.

| Sample | Activation                                            | First Sequence O <sub>2</sub> -CO                     |                                                | Second Sequence O <sub>2</sub> -CO |                                                       |                                                | Third Sequence O <sub>2</sub> -CO |                                                       |                                                |                                |
|--------|-------------------------------------------------------|-------------------------------------------------------|------------------------------------------------|------------------------------------|-------------------------------------------------------|------------------------------------------------|-----------------------------------|-------------------------------------------------------|------------------------------------------------|--------------------------------|
|        | O <sub>2</sub><br>uptake(umol/g <sub>catalyst</sub> ) | O <sub>2</sub><br>supply(umol/g <sub>catalyst</sub> ) | CO<br>consumption(umol/g <sub>catalyst</sub> ) | CO:O <sub>2</sub><br>(mol:mol)     | O <sub>2</sub><br>supply(umol/g <sub>catalyst</sub> ) | CO<br>consumption(umol/g <sub>catalyst</sub> ) | CO:O <sub>2</sub><br>(mol:mol)    | O <sub>2</sub><br>supply(umol/g <sub>catalyst</sub> ) | CO<br>consumption(umol/g <sub>catalyst</sub> ) | CO:O <sub>2</sub><br>(mol:mol) |
| PC-1   | 226                                                   | 220                                                   | 321                                            | 1.5                                | 142                                                   | 272                                            | 1.9                               | 129                                                   | 256                                            | 2.0                            |
| PC-2   | 143                                                   | 146                                                   | 88                                             | 0.6                                | 44                                                    | 76                                             | 1.8                               | 35                                                    | 59                                             | 1.8                            |
| PC-3   | 119                                                   | 125                                                   | 60                                             | 0.5                                | 18                                                    | 34                                             | 1.9                               | 10                                                    | 22                                             | 2.2                            |
| PC-R   | 56                                                    | 19                                                    | 39                                             | 2.1                                | 18                                                    | 35                                             | 1.9                               | 19                                                    | 39                                             | 2.0                            |
